# Supplementary material for: The GH19 Engineering Database: Sequence diversity, substrate scope, and evolution in glycoside hydrolase family 19
Source: PLOS journal article supplement (doi:10.1371/journal.pone.0256817), 2021-10-26
Supplement: S2 (10.1371/journal.pone.0256817.s002) [file journal.pone.0256817.s002]

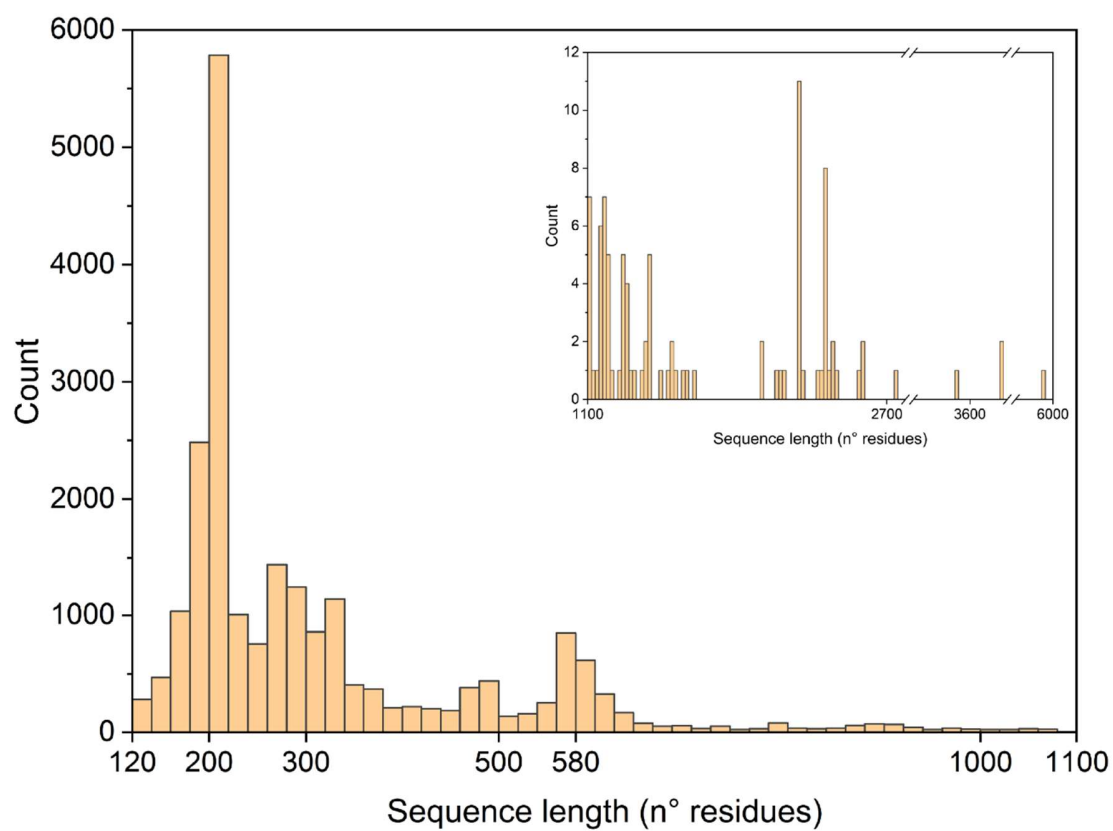

**Figure S2.** Length distribution histogram of sequence entries in the GH19ED database, with a bin size of 20 residues. The two main peaks are around 200 and 580 residues. Only few sequences are longer than 1100 residues (up to 6000 residues).
