# Supplementary material for: The GH19 Engineering Database: Sequence diversity, substrate scope, and evolution in glycoside hydrolase family 19
Source: PLOS journal article supplement (doi:10.1371/journal.pone.0256817), 2021-10-26
Supplement: S14 (10.1371/journal.pone.0256817.s014) [file journal.pone.0256817.s014]

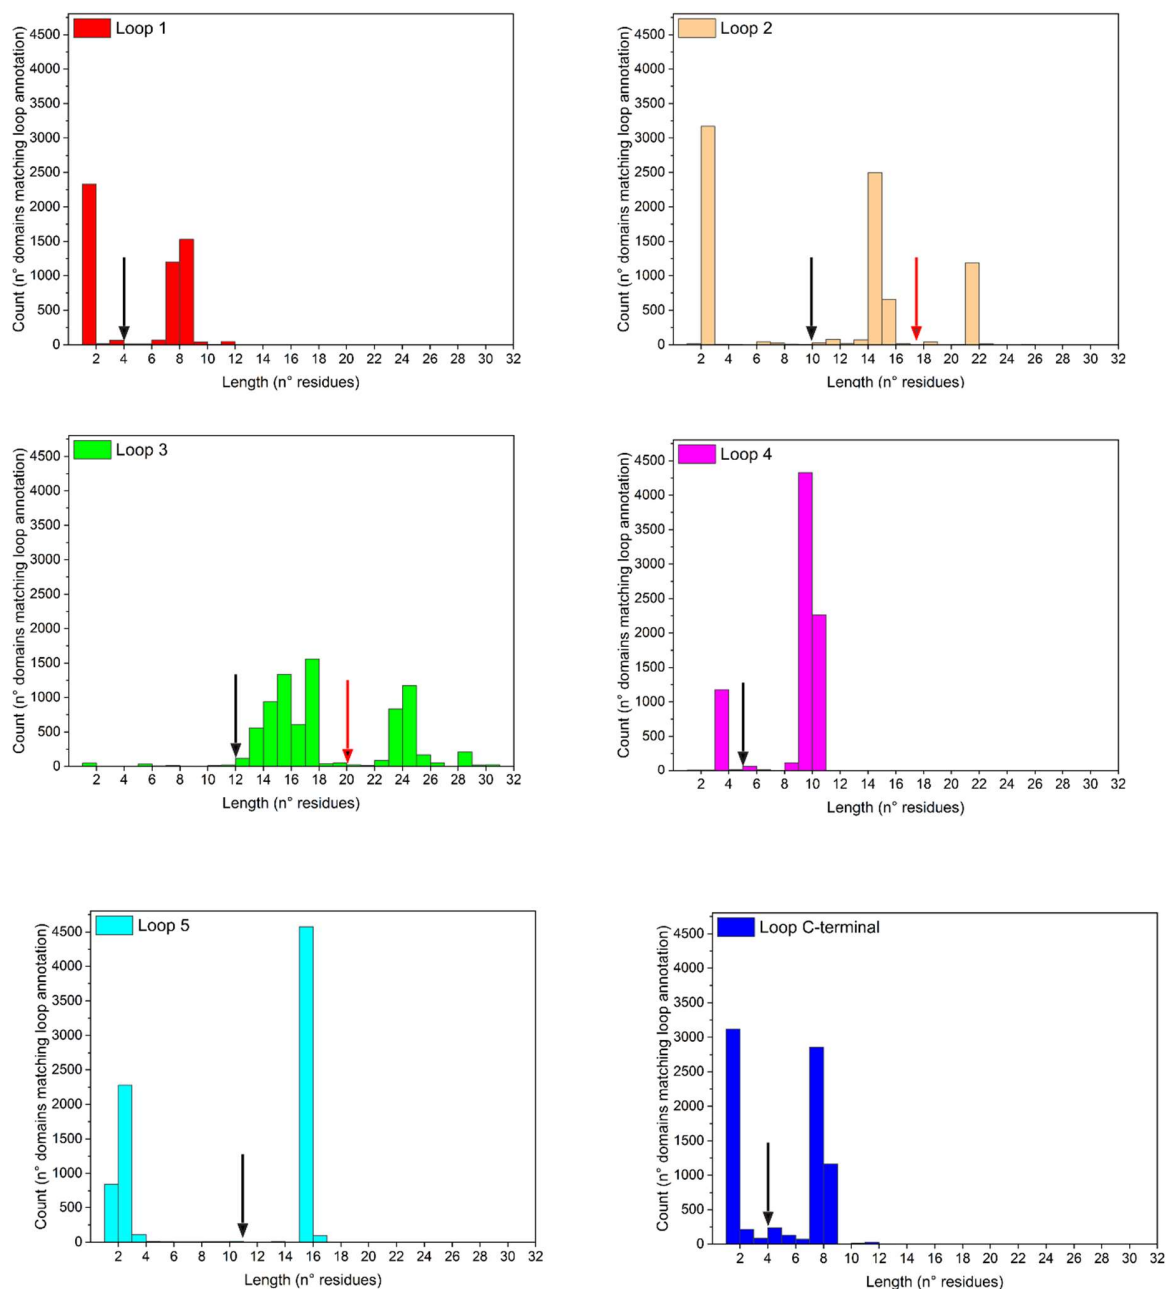

**Figure S14.** Length distribution of CHIT loop motifs. The black arrow indicates the minimum length threshold used to define the presence of a loop, as specified in the *Methods* section. The red arrow indicates the threshold used to separate the two modes of length observed for loops 2 and 3.
